# Supplementary material for: Genetic Variability and Population Structure of Ethiopian Sesame (Sesamum Indicum L.) Germplasm Assessed Through Phenotypic Traits and Simple Sequence Repeats Markers
Source: Research Square preprint supplement (doi:10.21203/rs.3.rs-226709/v1), 2021-02-25
Supplement: Supplementary file 1 [file 9bc9a3e137c3d5414189587b.docx]

**Supplementary Table 1.** Names and sources of 100 sesame accessions used in the study.

| Entry number | Entry name or designation | Description | Source (regions or research center in Ethiopia)† | Entry  Number | Entry name or designation | Description | Source (regions or research center in Ethiopia) |
| --- | --- | --- | --- | --- | --- | --- | --- |
| 1 | Hirhir Kebabo Hairless Sel-2 | Accession | Tigray | 32 | ABXT-85-SEL-2-1 | Accession | Afar |
| 2 | GXT=85(28-2) | Accession | Afar | 33 | Setit-2 | Variety | HuARC |
| 3 | Hirhir Kebabo Hairless-9 | Accession | Tigray | 34 | Hirhir Kebabo Hairless-Sel-7 | Accession | Tigray |
| 4 | NN-0068-1 | Accession | Amhara | 35 | NN-0143 | Accession | Amhara |
| 5 | NN-0108-2 | Accession | Amhara | 36 | ACC NS-031 | Accession | Oromia |
| 6 | NN-034 | Accession | Amhara | 37 | NN-0029(2) | Accession | Amhara |
| 7 | BCS-0041 | Accession | Afar | 38 | NN-0054 | Accession | Amhara |
| 8 | ACC-031-5-14 | Accession | Tigray | 39 | Morgo-Sel-P=13 | Accession | Afar |
| 9 | NN-0129-2 | Accession | Amhara | 40 | Hirhir Humera Sel-8 | Accession | Tigray |
| 10 | ACC-203-020 | Accession | Amhara | 41 | Tejareb Girar | Accession | Amhara |
| 11 | NN-0038-2 | Accession | Amhara | 42 | NN0027 | Accession | Amhara |
| 12 | Bawnji Fiyel Kolet | Accession | Amhara | 43 | NN0009 | Accession | Amhara |
| 13 | Gojam Azene (Aleka) | Accession | Amhara | 44 | ACC-203-610 | Accession | Amhara |
| 14 | Hirhir Humera Sel-6 | Accession | Tigray | 45 | NN-0146 | Accession | Amhara |
| 15 | Bawnji Gobate | Accession | Amhara | 46 | NN-0044-2 | Accession | Amhara |
| 16 | Shwarobit (83) | Accession | Amhara | 47 | NN-0018-2 | Accession | Amhara |
| 17 | Humera-1 | Variety | HuARC† | 48 | Hirhir Nigara 1st Sel-1 | Accession | Tigray |
| 18 | ACC-202-950 | Accession | Amhara | 49 | NN00136-1 | Accession | Amhara |
| 19 | NN-0026 | Accession | Amhara | 50 | NN-0088-2 | Accession | Amhara |
| 20 | ACC-NO-041 | Accession | Tigray | 51 | Hirhir Baeker-Sel-3 | Accession | Tigray |
| 21 | ACC-203-612 | Accession | Amhara | 52 | NN0068-3 | Accession | Amhara |
| 22 | ACC-200-064-1 | Accession | Tigray | 53 | NN0074-3 | Accession | Amhara |
| 23 | Setit-1 | Variety | HuARC | 54 | NN0036-1 | Accession | Amhara |
| 24 | Tejareb Kokit Sel-3 | Accession | Amhara | 55 | Hirhir Kebabo Hairless Sel-4 | Accession | Tigray |
| 25 | Orofalc ACC-2 | Accession | Afar | 56 | NN0001-2 | Accession | Amhara |
| 26 | NN-0022 | Accession | Amhara | 57 | Bawnji Sel-2 | Accession | Amhara |
| 27 | Setit-3 | Variety | HuARC | 58 | NN0058-2 | Accession | Amhara |
| 28 | ABX=2-01-2 | Accession | Afar | 59 | G-02 | Accession | Amhara |
| 29 | NN-0020 | Accession | Amhara | 60 | ACC-NS-007(2) | Accession | Oromia |
| 30 | ACC-NS-010 | Accession | Oromia | 61 | GA-002(3) | Accession | Gambela |
| 31 | Hirhir Sel-2 | Accession | Tigray | 62 | Endelemi Kirem Sel-2 | Accession | Amhara |

**Table 1.** (Continued).

| Entry Number | Entry name or designation | Description | Source (Regions or research center in Ethiopia)**†** | Entry Number | Entry name or designation | Description | Source (Regions or research center in Ethiopia) |
| --- | --- | --- | --- | --- | --- | --- | --- |
| 63 | ACC-205-299 | Accession | Tigray | 82 | NN0061 | Accession | Amhara |
| 64 | Hirhir Kebabo Early Sel-1 | Accession | Tigray | 83 | ABXC-50402 | Accession | Afar |
| 65 | NN0016-1 | Accession | Amhara | 84 | NN0021 | Accession | Amhara |
| 66 | Hirhir Adgeshu Sel -8 | Accession | Tigray | 85 | NN0079-1 | Accession | Amhara |
| 67 | NN0015 | Accession | Amhara | 86 | ACC 202-333 | Accession | Amhara |
| 68 | NN01-13 | Accession | Amhara | 87 | NN-0052 | Accession | Amhara |
| 69 | Bering Bawany | Accession | Afar | 88 | NN-0029-1 | Accession | Amhara |
| 70 | Hirhir Nigara 1st Sel-2 | Accession | Tigray | 89 | Teiahir Sanja Sel-6 | Accession | Amhara |
| 71 | Gojam Azene (Yohans Sel-1) | Accession | Amhara | 90 | ACC-202-358 | Accession | Amhara |
| 72 | NN0038-1 | Accession | Amhara | 91 | NN0032 | Accession | Amhara |
| 73 | NN0104 | Accession | Amhara | 92 | NN0071 | Accession | Amhara |
| 74 | Hirhir Kebabo Hairless Sel-6 | Accession | Tigray | 93 | NN0064-1 | Accession | Amhara |
| 75 | ACC 205-180 | Accession | Tigray | 94 | NN0056 | Accession | Amhara |
| 76 | Hirhir | Landrace | Tigray | 95 | NN-01-03 | Accession | Amhara |
| 77 | ACC 203-616 | Accession | Amhara | 96 | NN0032-2 | Accession | Amhara |
| 78 | NN0025 | Accession | Amhara | 97 | Bawnji Maksegnt | Accession | Amhara |
| 79 | NN-0183-3 | Accession | Amhara | 98 | Bawnji Flwha Sel-2 | Accession | Amhara |
| 80 | Hirhir Humera | Accession | Tigray | 99 | NN0068-2 | Accession | Amhara |
| 81 | NN0031 | Accession | Amhara | 100 | Hirhir Filwha Large Seeded | Accession | Amhara |

†HuARC, Humera Agricultural Research Centre

**†** Tigray, Amhara, Afar, Oromia and Gambela are administrative regions in Ethiopia.

**Supplementary Table 2.** Description of the SSR markers used in the study.

| No | Primers | Forward primer sequence | Reverse primer sequence | Product size (bp) |
| --- | --- | --- | --- | --- |
| 1 | ID0046 | TCAACGTGATTGCTCCCATA | CAGCTGCCTGAAAGAAGAGG | 101 |
| 2 | ZMM1043 | CCCGAAAATAGGATTTCTAACCA | TTTTGGACTGCTATTGAGGGA | 184 |
| 3 | ZMM3261 | CGAAAGCATGAGACGAGTATG | AACTAGTGCGCAATTCATTCAA | 244 |
| 4 | ID0041 | AGGCTTTCACATCATCAAATG | CATGTAGGATGCAACTCTTCAAA | 280 |
| 5 | ZMM5015 | ATTTATTGGGTTGCTGGGAA | TGAAAATTAAGTCACCAGTACCACC | 151 |
| 6 | ZMM4664 | CCTTCACTTCAAATCCGTCAA | TTTGGTTTGCATAGATGCTCTT | 184 |
| 7 | ZMM1809 | TTAAGCCTCGTTGACTCCAA | ATTGTACGGCATGTTGTCCC | 256 |
| 8 | ZMM2321 | CAACACCACCAACGCATATC | AGCAACGATTCACGACATTG | 280 |
| 9 | ZMM5358 | TAGGATGCTTTGAATTGGGC | AGGAACAAACATACGGCGTC | 164 |
| 10 | ID0068 | TCTTCGGAGTTAACACCCTCA | TTGGATTTCCATGTATGCCA | 199 |
| 11 | ZMM3312 | GCAAAATCTTCTTTCCTCCG | GCAGCAAGGGAATTGAATGT | 264 |
| 12 | ZMM1033 | CGTAGTGGTTCCCCTCACAT | ATGCTTTCCCCCAAATAACC | 179 |
| 13 | ZMM1189 | TATCCAGGGGAAAACCAGAA | TTGGATTTTCCTTCTCACGC | 212 |
| 14 | ZMM2202 | TCAGGAAGAAAGAATTGCTGC | CAATTTAACCATCCTGACTC | 276 |
| 15 | ZMM1637 | GCGGTGACATATTAAGGGCA | ACCGGAATCCGAACATGTAA | 265 |
| 16 | ZMM4645 | TTGAGCGATTCATCGACTTG | TTCTCCGGCCATTTTAATCA | 179 |
| 17 | ZMM1700 | CATTAACACCATTACGCAAACA | TTTGGCAAAACTAGCAATGAA | 258 |
| 18 | ID0175 | CAATTTTGATTTCTTTATCTATTTTCG | TCGAGTGCCCGAATTTTAAG | 271 |
| 19 | ZMM1353 | GCCAAAACAAAGGATTCAAGA | TGAGCTTTGTGTGACCATGA | 169 |
| 20 | ID0145 | ACCCTCCCTCCATGAATTTT | CCTCCATCTCATCTCATCCC | 196 |
| 21 | ZMM4803 | TGCATGAGCTAAGGGAAAGG | TGGTGGCAATTTGCAAGTAA | 268 |
| 22 | ZMM6141 | AAAAAGCAAAATCCATAATTTGA | TTGCCCCCTCAACTATTTG | 167 |
| 23 | ZMM3013 | TGCCAGTTGGCATATACCATTA | GAGCCGGTCTGAAATTTATCC | 216 |
| 24 | ZMM2818 | CGTGTGCCCAATATTTGAGTT | TCAACCTCCTCCCTACACAA | 279 |
| 25 | ZMM3223 | CGATGGTTATTAAATTAAGTATTCGG | GACATTTGAAGCAAAGTGTATCG | 279 |
| 26 | ZMM1691 | CTTGACCTGGAGTGTACGGC | GGATCAAACAGACACGAGCA | 220 |
| 27 | ZMM1851 | TGACTCTTTCGATTTGGGCT | CGAAAAATACGGGCGTTACT | 280 |

Source: Wei et al. (2014), bp = base pairs
